# Supplementary material for: The Medicago sativa gene index 1.2: a web-accessible gene expression atlas for investigating expression differences between Medicago sativa subspecies
Source: PubMed Central journal article supplement (PMC4492073; doi:10.1186/s12864-015-1718-7), 2015-07-07
Supplement: 12864_2015_1718_MOESM4_ESM.pdf [file 12864_2015_1718_MOESM4_ESM.pdf]

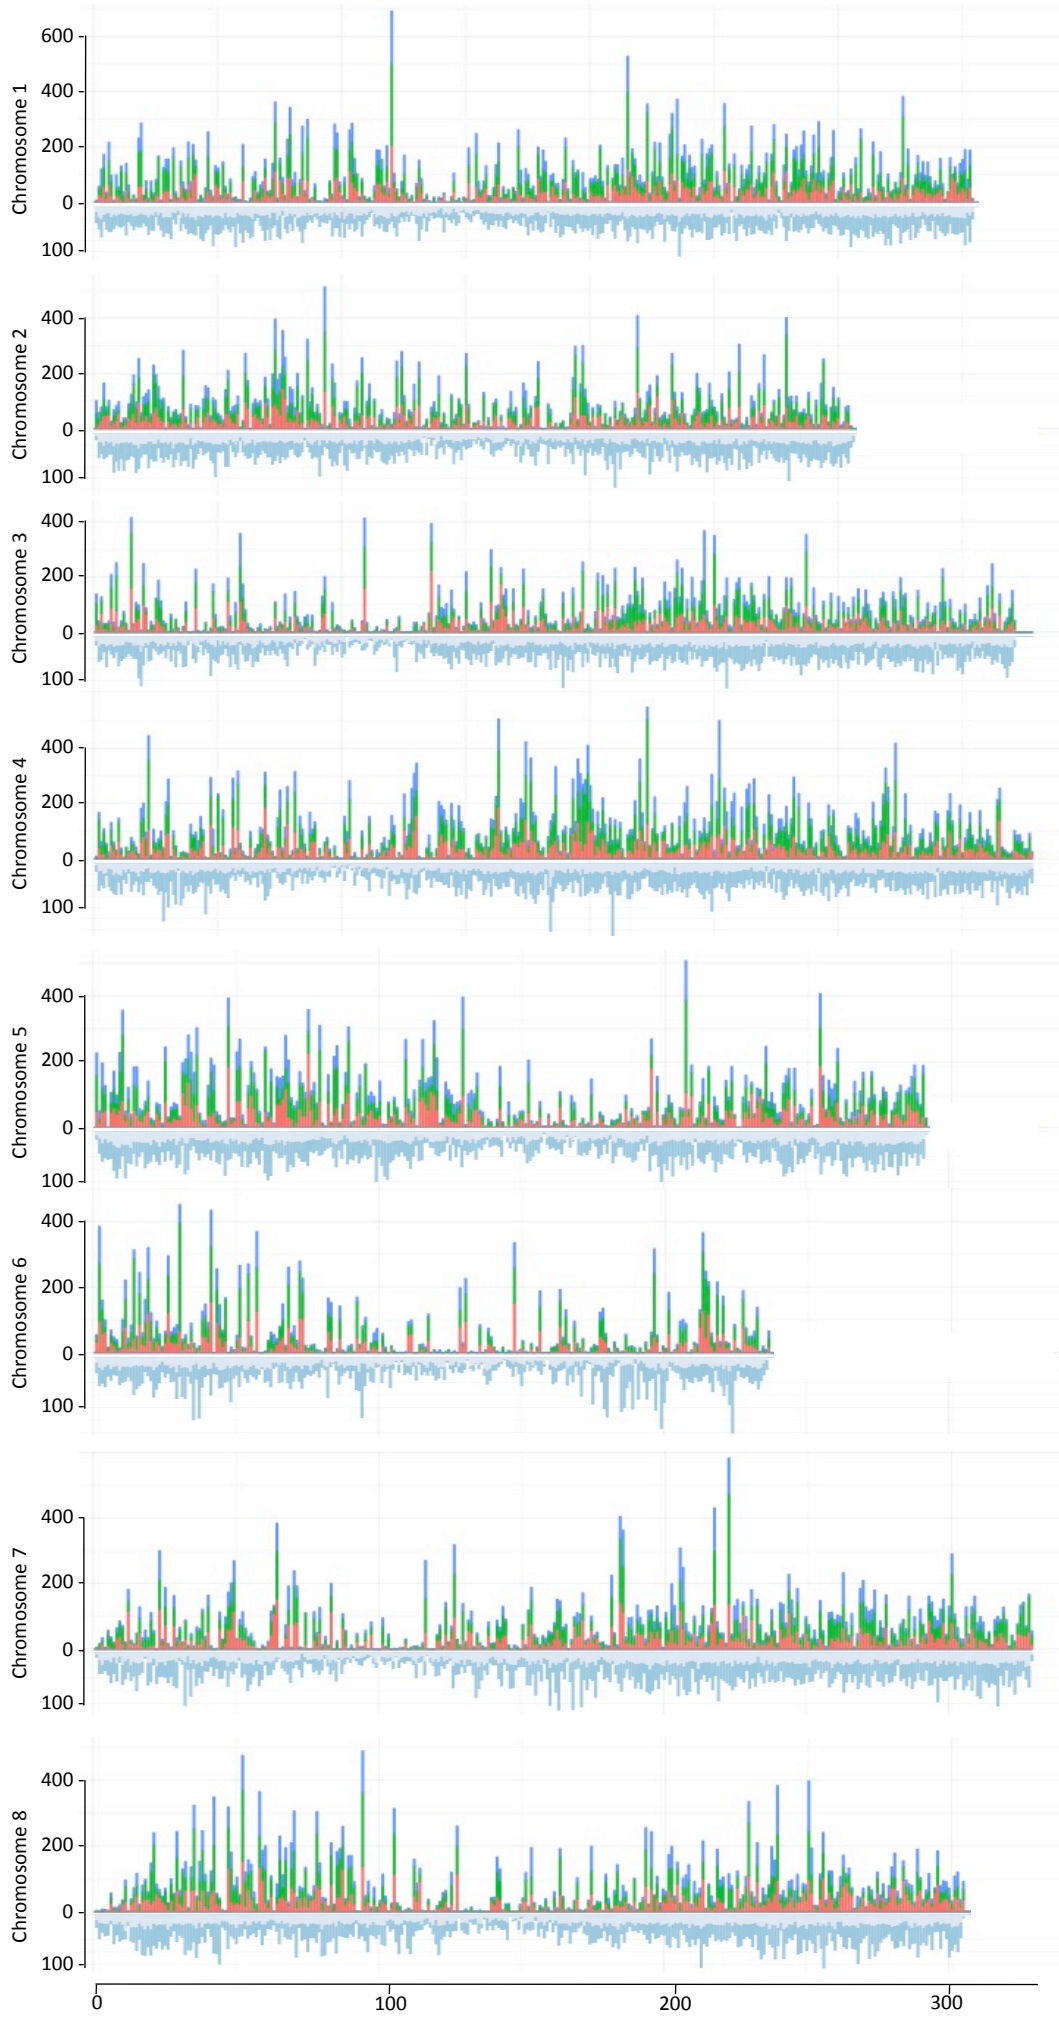

- SNPs in both B47 and F56
- SNPs unique to F56
- SNPs unique to B47
- Mt 4.0 genes
- MSGI 1.2 sequences that align with Mt 4.0 genes
