# Supplementary material for: The Medicago sativa gene index 1.2: a web-accessible gene expression atlas for investigating expression differences between Medicago sativa subspecies
Source: PubMed Central journal article supplement (PMC4492073; doi:10.1186/s12864-015-1718-7), 2015-07-07
Supplement: 12864_2015_1718_MOESM15_ESM.pdf [file 12864_2015_1718_MOESM15_ESM.pdf]

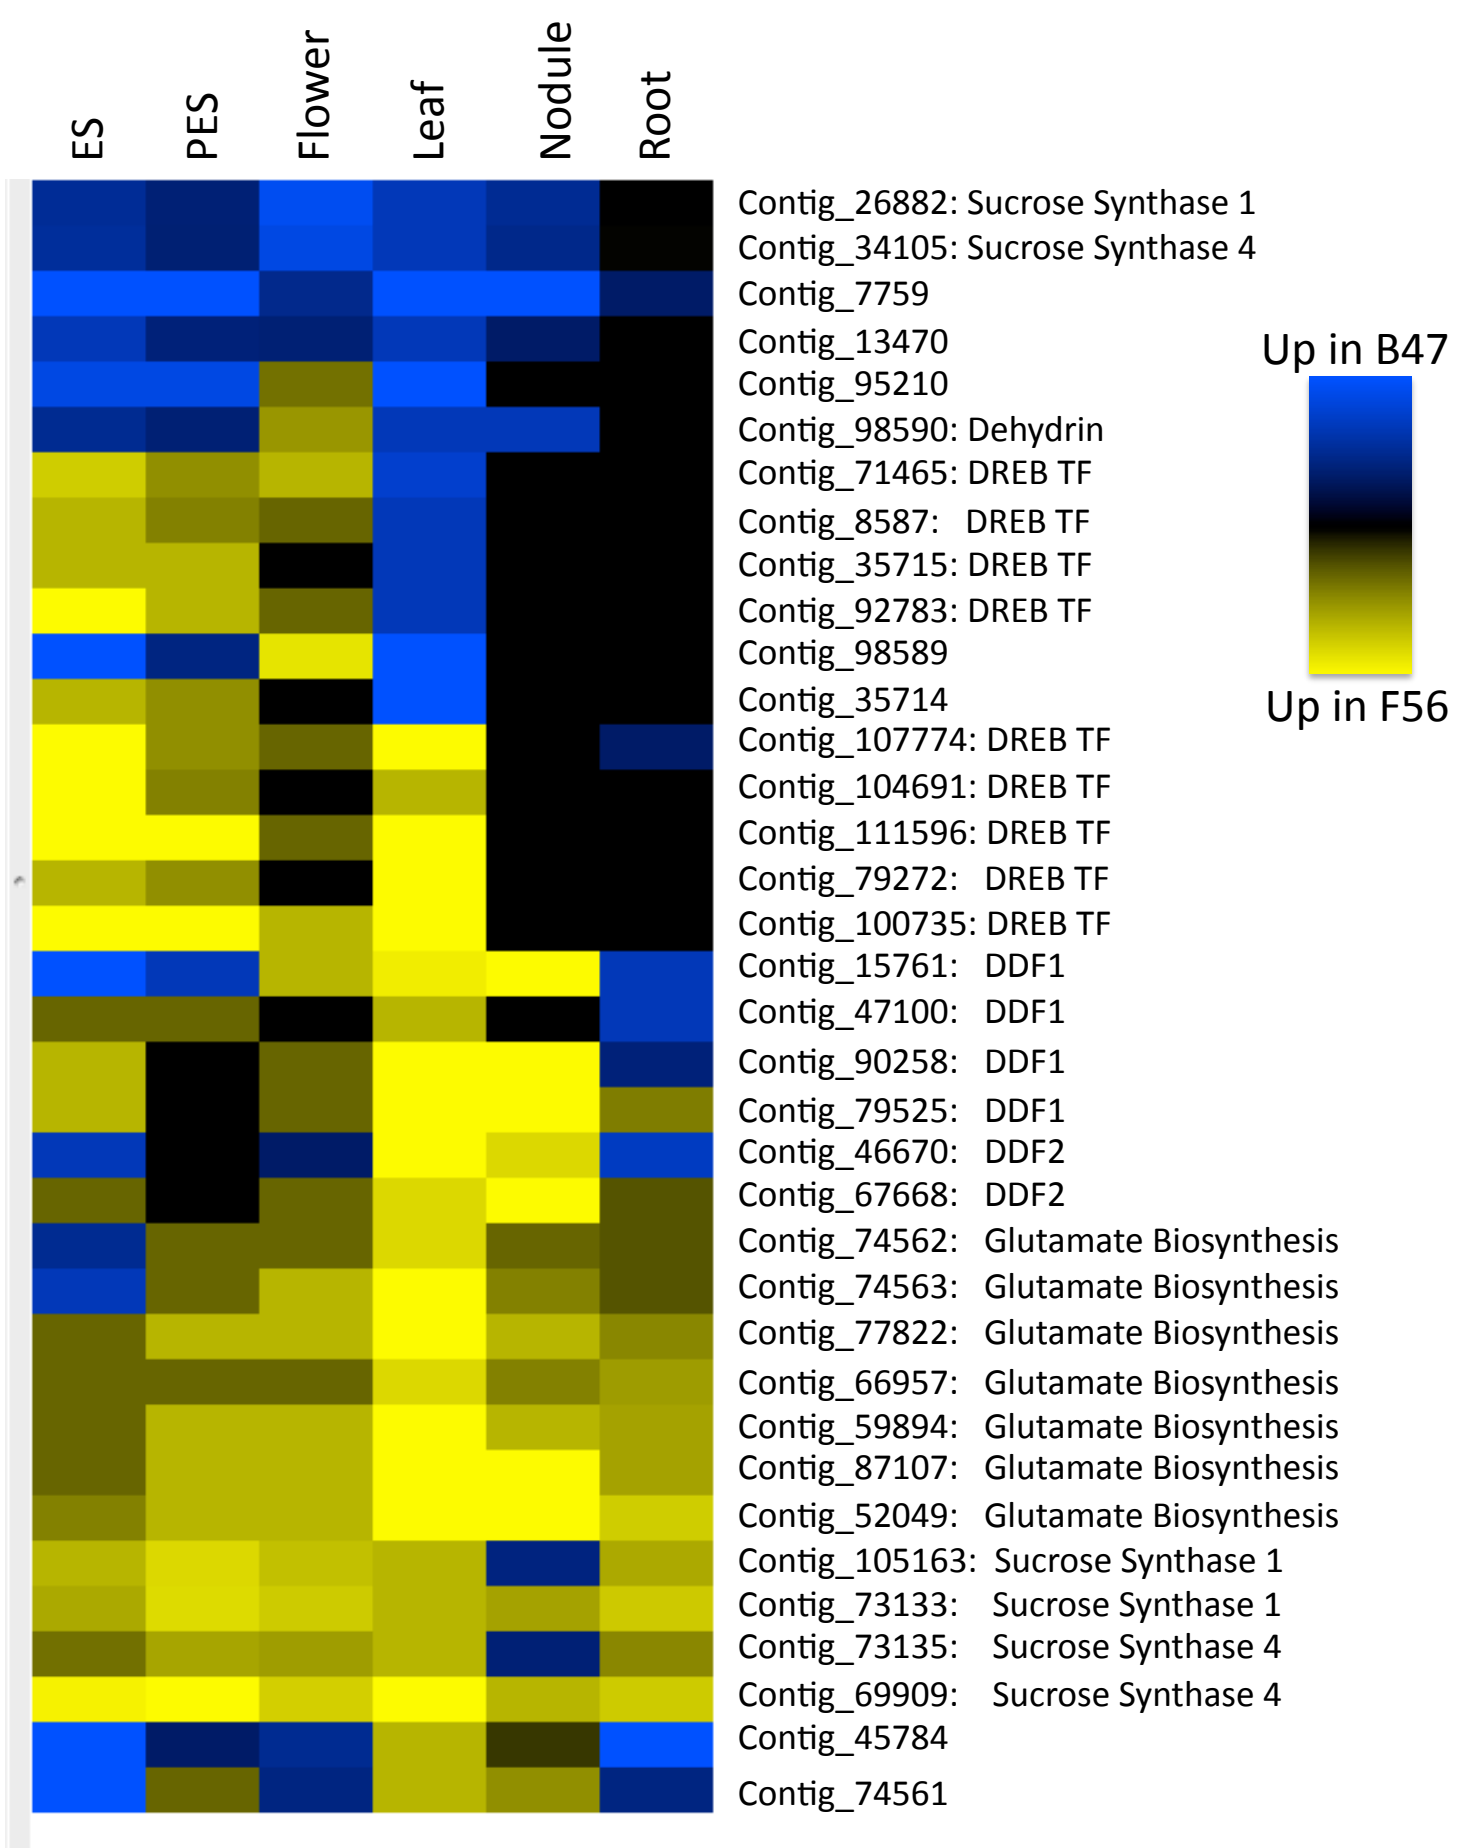

Additional file 15. Expression profile of sequences previously identified as cold inducible in *M. sativa* ssp. *falcata* [33,34], but which are  $\geq 2$ -fold different between B47 and F56 under normal growth conditions. Expression is depicted as fold change of F56/B47. DDF1 (dehydration response element), DREB (DRE binding factor).
